# Supplementary material for: Facile photocatalytic reduction of carcinogenic Cr(vi) on Fe-doped copper sulfide nanostructures
Source: Royal Society of Chemistry journal article supplement (doi:10.1039/d0ra04852f), 2020-01-01
Supplement: d0ra04852f1.pdf [file d0ra04852f1.pdf]

## Supplementary Information

### Facile photocatalytic reduction of carcinogenic Cr(VI) on Fe-doped copper sulfide nanostructures

Noor ul Ain<sup>a</sup>, Zia-ur-Rehman<sup>a\*</sup>, Ujala Nayab<sup>a</sup>, Jamal Abdul Nasir<sup>a</sup>, Asma Aamir<sup>a</sup>

<sup>a</sup>Department of Chemistry Quaid-i-Azam University Islamabad-45320, Pakistan.

**\*Corresponding author**

Email: [zrehman@qau.edu.pk](mailto:zrehman@qau.edu.pk) / [hafizqau@yahoo.com](mailto:hafizqau@yahoo.com)

Tel: 92-(051)90642245

Fax: 92-(051)90642241



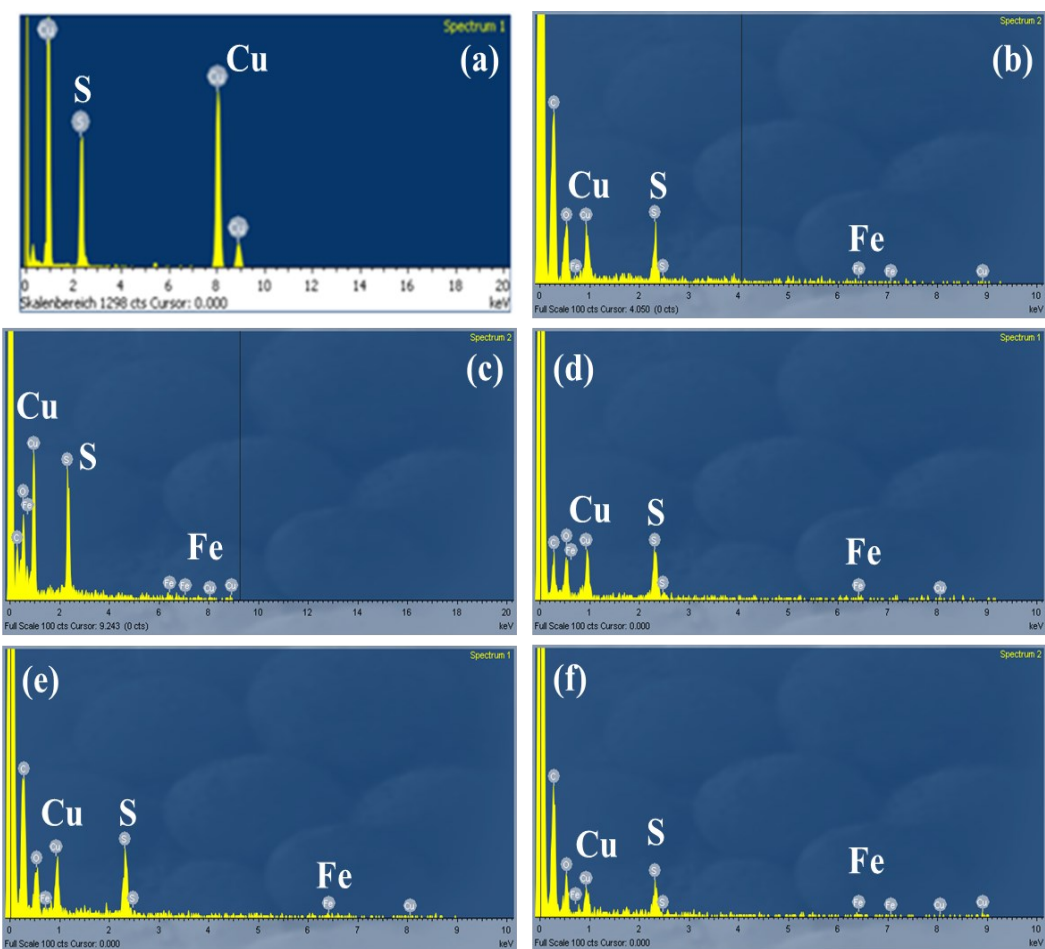

Figure S1: EDX Images of (a) pure CuS/Cu<sub>2</sub>S, (b) Fe (0.01)- CuS/Cu<sub>2</sub>S, (c) Fe (0.03)- CuS/Cu<sub>2</sub>S, (d) Fe (0.05)- CuS/Cu<sub>2</sub>S, (e) Fe (0.07)- CuS/Cu<sub>2</sub>S and (f) are Fe(0.09)- CuS/Cu<sub>2</sub>S,

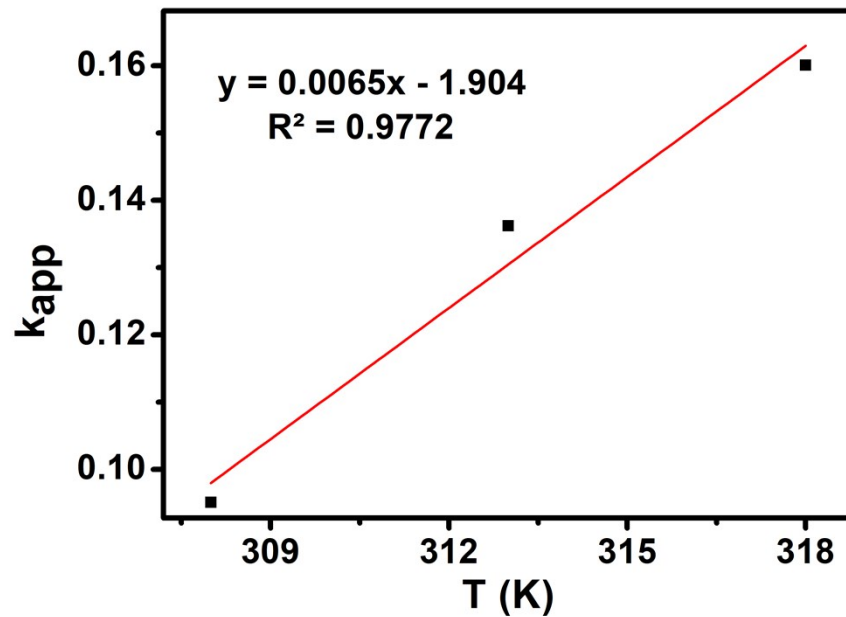

Figure S2: Rate of reaction for photocatalytic Cr (VI) reduction using formic acid increase linearly in the presence of  $Cu_{x-1}Fe_xS$  ( $x = 9\%$ ) nanostructures at different temperatures (35, 40, 45°C).

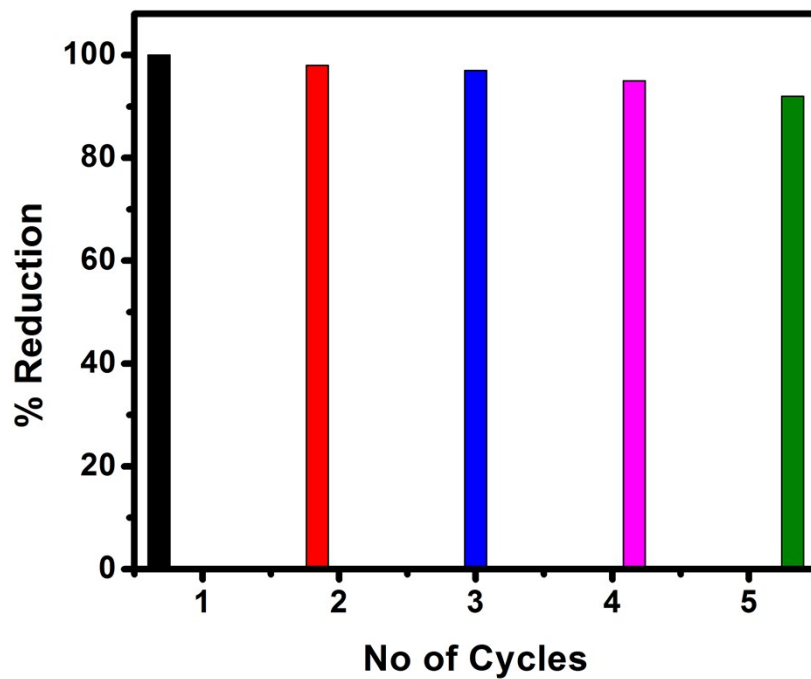

Figure S3: Stability test of 9% CuFeS NPs for 5 Cycles

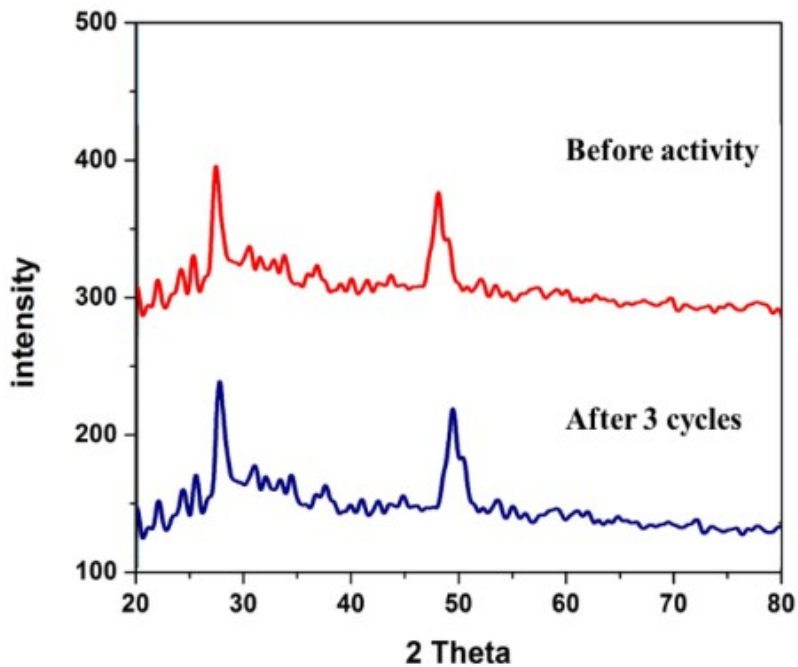

Figure S4: XRD pattern for  $\text{Cu}_{1-x}\text{Fe}_x\text{S}$  ( $x = 9\%$ ), before the activity and after recycling three times for Cr(VI) reduction.

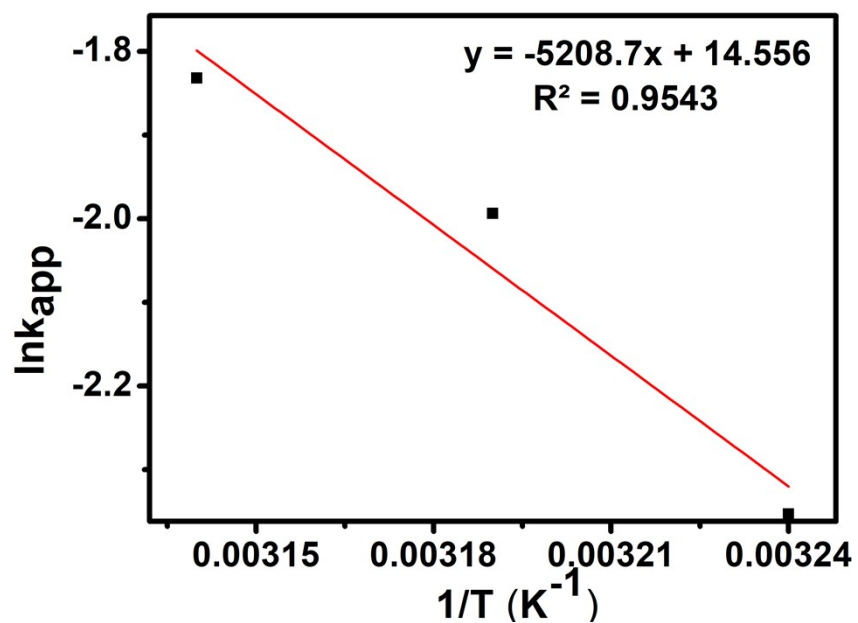

Figure S5: Arrhenius plot of the apparent rate constant

$k_{\text{app}}$  9%  $\text{Cu}_{1-x}\text{Fe}_x\text{S}$  nanostructure.

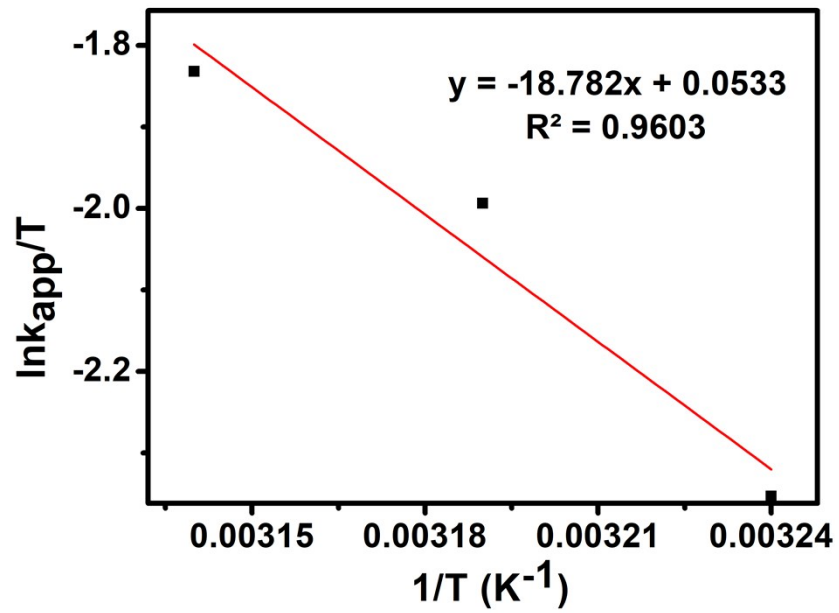

Figure S6: Eyring plot for 9%  $\text{Cu}_{1-x}\text{Fe}_x\text{S}$  nanostructures.
